# Supplementary material
Source: publisher site journal article supplement (https://www.dovepress.com/article/398440)
Supplement: Supplementary file 1 [file get_supplementary_file.php]

| **Table A1** Univariate regression analyses of factors associated with verbal working memory among OSAHS patients | | | | | |
| --- | --- | --- | --- | --- | --- |
| Variable | DSB score | | | |
| - | *β* | *P* | *OR* (95% *CI*) |
| Age | 0.000 | 0.985 | 1.000(0.953,1.050) |
| Gender (Female) | 0.112 | 0.893 | 1.119(0.217,5.757) |
| BMI | 0.097 | 0.078 | 1.102(0.989,1.228) |
| Years of education | -0.219 | 0.002 | 0.803(0.698,0.925) |
| Years of snoring | -0.014 | 0.653 | 0.986(0.928,1.048) |
| Smoking | 0.079 | 0.836 | 1.083(0.512,2.291) |
| Drinking | -0.285 | 0.492 | 0.752(0.333,1.697) |
| Poor memory | -0.086 | 0.811 | 0.917(0.453,1.860) |
| Morning fatigue | -0.122 | 0.731 | 0.885(0.442,1.774) |
| Daytime sleepiness | 0.011 | 0.976 | 1.011(0.502,2.033) |
| TST | 0.002 | 0.463 | 1.002(0.997,1.006) |
| Sleep efficiency | 0.019 | 0.229 | 1.019(0.988,1.051) |
| NREM 1, % | 0.010 | 0.473 | 1.010(0.984,1.036) |
| NREM 2, % | 0.000 | 0.973 | 1.000(0.972,1.030) |
| NREM 3, % | -0.017 | 0.396 | 0.983(0.944,1.023) |
| REM, % | 0.025 | 0.443 | 1.025(0.963,1.091) |
| AHI | 0.016 | 0.047 | 1.016(1.000,1.033) |
| ODI | 0.015 | 0.043 | 1.016(1.000,1.031) |
| TS90 | 0.018 | 0.076 | 1.018(0.998,1.038) |
| AvgSaO2 | -0.115 | 0.064 | 0.892(0.790,1.007) |
| LSaO2 | -0.021 | 0.141 | 0.979(0.952,1.007) |
| ArI | 0.002 | 0.776 | 1.002(0.986,1.020) |
| Hypercapnia | 1.216 | 0.002 | 3.375(1.581,7.206) |

Abbreviations: OSAHS, obstructive sleep apnea-hypopnea syndrome; DSB, Digit Span Backward Test; BMI, body mass index; TST, total sleep time; NREM, non-rapid eye movement; REM, rapid eye movement; AHI, apnea-hypopnea index; ODI, oxygen desaturation index; TS90, percentage of total time with oxygen saturation level < 90%; AvgSaO2, average arterial oxygen saturation; LSaO2, lowest arterial oxygen saturation; ArI, arousal index.

| **Table A2** Univariate regression analyses of factors associated with visual memory among OSAHS patients | | | | | | | | | |
| --- | --- | --- | --- | --- | --- | --- | --- | --- | --- |
| Variable | Accuracy of immediate PRM | | | Accuracy of delayed PRM | | | Accuracy of SRM | | |
| - | *β* | *P* | *OR* (95% *CI*) | *β* | *P* | *OR* (95% *CI*) | *β* | *P* | *OR* (95% *CI*) |
| Age | 0.007 | 0.772 | 1.007(0.959,1.059) | -0.012 | 0.631 | 0.988(0.941,1.038) | 0.003 | 0.910 | 1.003(0.948,1.062) |
| Gender (Female) | -0.288 | 0.745 | 0.750(0.132,4.250) | -1.593 | 0.151 | 0.203(0.023,1.790) | -0.457 | 0.682 | 0.633(0.071,5.636) |
| BMI | -0.009 | 0.862 | 0.991(0.891,1.101) | -0.074 | 0.172 | 0.928(0.835,1.033) | 0.074 | 0.228 | 1.077(0.955,1.215) |
| Years of education | -0.140 | 0.036 | 0.870(0.763,0.991) | -0.089 | 0.169 | 0.915(0.806,1.038) | -0.004 | 0.962 | 0.996(0.861,1.153) |
| Years of snoring | -0.001 | 0.983 | 0.999(0.939,1.063) | 0.042 | 0.187 | 1.042(0.980,1.109) | 0.072 | 0.035 | 1.075(1.005,1.150) |
| Smoking | 0.380 | 0.326 | 1.462(0.685,3.122) | 0.476 | 0.216 | 1.610(0.757,3.424) | 0.347 | 0.427 | 1.414(0.601,3.327) |
| Drinking | 0.122 | 0.770 | 1.130(0.498,2.562) | 0.016 | 0.970 | 1.016(0.453,2.275) | 0.372 | 0.422 | 1.450(0.585,3.598) |
| Poor memory | 0.289 | 0.429 | 1.336(0.652,2.738) | 0.253 | 0.482 | 1.288(0.636,2.661) | 0.381 | 0.360 | 1.464(0.647,3.313) |
| Morning fatigue | -0.414 | 0.253 | 0.661(0.325,1.343) | 0.057 | 0.873 | 1.058(0.528,2.120) | 0.357 | 0.402 | 1.429(0.620,3.293) |
| Daytime sleepiness | 0.005 | 0.989 | 1.005(0.493,2.051) | 0.317 | 0.376 | 1.373(0.681,2.769) | 0.275 | 0.519 | 1.317(0.517,3.038) |
| TST | 0.003 | 0.174 | 1.003(0.999,1.008) | 0.005 | 0.044 | 1.005(1.000,1.010) | -0.003 | 0.309 | 0.997(0.992,1.003) |
| Sleep efficiency | 0.031 | 0.072 | 1.031(0.997,1.066) | 0..017 | 0.273 | 1.017(0.987,1.049) | -0.001 | 0.961 | 0.999(0.965,1.035) |
| NREM 1, % | 0.008 | 0.559 | 1.008(0.982,1.034) | -0.001 | 0.912 | 0.999(0.974,1.024) | 0.018 | 0.195 | 1.018(0.991,1.047) |
| NREM 2, % | -0.016 | 0.300 | 0.984(0.955,1.014) | -0.018 | 0.230 | 0.982(0.953,1.012) | -0.005 | 0.770 | 0.995(0.961,1.030) |
| NREM 3, % | 0.006 | 0.757 | 1.006(0.966,1.048) | 0.019 | 0.351 | 1.019(0.979,1.061) | -0.019 | 0.448 | 0.982(0.936,1.030) |
| REM, % | 0.043 | 0.193 | 1.044(0.978,1.115) | 0.072 | 0.034 | 1.074(1.005,1.148) | 0.024 | 0.532 | 1.024(0.951,1.103) |
| AHI | 0.011 | 0.159 | 1.012(0.996,1.028) | 0.001 | 0.875 | 1.001(0.986,1.017) | 0.016 | 0.083 | 1.016(0.998,1.035) |
| ODI | 0.011 | 0.141 | 1.011(0.996,1.026) | 0.001 | 0.926 | 1.001(0.986,1.015) | 0.015 | 0.081 | 1.015(0.998,1.032) |
| TS90 | 0.007 | 0.436 | 1.007(0.989,1.026) | 0.000 | 0.985 | 1.000(0.982,1.018) | 0.013 | 0.217 | 1.013(0.993,1.003) |
| AvgSaO2 | -0.059 | 0.310 | 0.942(0.840,1.057) | -0.004 | 0.949 | 0.996(0.890,1.116) | -0.104 | 0.098 | 0.901(0.797,1.019) |
| LSaO2 | -0.014 | 0.335 | 0.986(0.959,1.014) | 0.008 | 0.580 | 1.008(0.980,1.036) | -0.030 | 0.057 | 0.970(0.940,1.001) |
| ArI | 0.002 | 0.841 | 1.002(0.985,1.019) | -0.011 | 0.225 | 0.989(0.972,1.007) | 0.014 | 0.148 | 1.014(0.995,1.034) |
| Hypercapnia | 0.720 | 0.055 | 2.055(0.984,4.289) | 0.595 | 0.110 | 1.812(0.784,3.759) | 1.139 | 0.007 | 3.122(1.360,7.169) |

Abbreviations:OSAHS, obstructive sleep apnea-hypopnea syndrome; PRM, Pattern Recognition Memory; SRM, Spatial Recognition Memory; BMI, body mass index; TST, total sleep time; NREM, non-rapid eye movement; REM, rapid eye movement; AHI, apnea-hypopnea index; ODI, oxygen desaturation index; TS90, percentage of total time with oxygen saturation level < 90%; AvgSaO2, average arterial oxygen saturation; LSaO2, lowest arterial oxygen saturation; ArI, arousal index.

| **Table A3** Univariate regression analyses of factors associated with spatial memory among OSAHS patients | | | | | | | | | |
| --- | --- | --- | --- | --- | --- | --- | --- | --- | --- |
| Variable | SSP score | | | SWM between errors | | | SWM strategy | | |
| - | *β* | *P* | *OR* (95% *CI*) | *β* | *P* | *OR* (95% *CI*) | *β* | *P* | *OR* (95% *CI*) |
| Age | 0.012 | 0.634 | 1.012(0.964,1.063) | 0.003 | 0.920 | 1.003(0.955,1.053) | 0.014 | 0.569 | 1.014(0.966,1.065) |
| Gender (Female) | 0.241 | 0.773 | 1.273(0.247,6.553) | 0.967 | 0.274 | 2.630(0.464,14.890) | 0.902 | 0.308 | 2.464(0.435,13.950) |
| BMI | 0.033 | 0.531 | 1.034(0.931,1.148) | 0.094 | 0.088 | 1.098(0.986,1.223) | 0.059 | 0.276 | 1.060(0.954,1.178) |
| Years of education | -0.163 | 0.016 | 0.850(0.744,0.970) | 0.013 | 0.836 | 1.013(0.894,1,148) | 0.008 | 0.900 | 1.008(0.890,1.142) |
| Years of snoring | -0.056 | 0.092 | 0.946(0.886,1.009) | 0.053 | 0.095 | 1.055(0.991,1.123) | 0.029 | 0.351 | 1.029(0.969,1.094) |
| Smoking | 0.108 | 0.778 | 1.114(0.525,2.365) | -0.189 | 0.626 | 0.828(0.388,1.768) | -0.127 | 0.741 | 0.881(0.414,1.871) |
| Drinking | 0.047 | 0.909 | 1.048(0.466,2.356) | -0.125 | 0.764 | 0.883(0.391,1.994) | -0.034 | 0.935 | 0.967(0.430,2.172) |
| Poor memory | 0.506 | 0.163 | 1.659(0.814,3.379) | -0.018 | 0.960 | 0.982(0.483,1.997) | 0.013 | 0.971 | 1.013(0.499,2.055) |
| Morning fatigue | 0.045 | 0.900 | 1.046(0.520,2.103) | 0.300 | 0.403 | 1.350(0.669,2.726) | 0.405 | 0.258 | 1.500(0.743,3.028) |
| Daytime sleepiness | 0.449 | 0.215 | 1.567(0.770,3.192) | 0.189 | 0.600 | 1.208(0.597,2.444) | 0.292 | 0.417 | 1.339(0.662,2.707) |
| TST | 0.002 | 0.337 | 1.002(0.998,1.007) | -0.004 | 0.071 | 0.996(0.991,1.000) | -0.003 | 0.159 | 0.997(0.992,1.001) |
| Sleep efficiency | -0.006 | 0.686 | 0.994(0.964,1.024) | -0.020 | 0.196 | 0.980(0.951,1.010) | -0.014 | 0.367 | 0.986(0.957,1.016) |
| NREM 1, % | -0.006 | 0.644 | 0.994(0.968,1.020) | 0.023 | 0.127 | 1.023(0.994,1.053) | 0.020 | 0.167 | 1.020(0.992,1.050) |
| NREM 2, % | 0.009 | 0.560 | 1.009(0.979,1.039) | -0.006 | 0.712 | 0.994(0.966,1.024) | -0.003 | 0.816 | 0.997(0.968,1.026) |
| NREM 3, % | -0.023 | 0.264 | 0.977(0.938,1.018) | 0.007 | 0.731 | 1.007(0.968,1.048) | 0.006 | 0.787 | 1.006(0.966,1.046) |
| REM, % | 0.000 | 0.988 | 1.000(0.940,1.066) | -0.077 | 0.025 | 0.926(0.866,0.990) | -0.070 | 0.038 | 0.932(0.873,0.996) |
| AHI | 0.008 | 0.314 | 1.008(0.992,1.024) | -0.001 | 0.886 | 0.999(0.983,1.015) | 0.000 | 0.959 | 1.000(0.985,1.016) |
| ODI | 0.013 | 0.094 | 1.013(0.998.1,028) | -0.003 | 0.688 | 0.997(0.982,1.012) | -0.001 | 0.889 | 0.999(0.984,1.014) |
| TS90 | 0.007 | 0.478 | 1.007(0.988.1.025) | 0.006 | 0.517 | 1.006(0.988,1.025) | 0.009 | 0.339 | 1.009(0.991,1.028) |
| AvgSaO2 | -0.045 | 0.442 | 0.956(0.853,1.072) | -0.045 | 0.442 | 0.956(0.853,1.072) | -0.056 | 0.339 | 0.946(0.843,1.060) |
| LSaO2 | -0.012 | 0.413 | 0.989(0.962,1.016) | -0.015 | 0.298 | 0.985(0.959,1.013) | -0.016 | 0.269 | 0.985(0.958,1.012) |
| ArI | 0.005 | 0.552 | 1.005(0.988,1.023) | 0.003 | 0.754 | 1.003(0.986,1.020) | 0.007 | 0.432 | 1.007(0.990,1.024) |
| Hypercapnia | 1.421 | 0.000 | 4.143(1.925,8.917) | 1,123 | 0.003 | 3.075(1.455,6.497) | 1.022 | 0.007 | 2.779(1.320,5.852) |

Abbreviations: OSAHS, obstructive sleep apnea-hypopnea syndrome; SSP, Spatial Span; SWM, Spatial Working Memory; BMI, body mass index; TST, total sleep time; NREM, non-rapid eye movement; REM, rapid eye movement; AHI, apnea-hypopnea index; ODI, oxygen desaturation index; TS90, percentage of total time with oxygen saturation level < 90%; AvgSaO2, average arterial oxygen saturation; LSaO2, lowest arterial oxygen saturation; ArI, arousal index.
